# Supplementary material
Source: PubMed Central journal article supplement (PMC5003157)
Supplement: 10.1194_D068866_jlr.D068866-1.pdf [file 10.1194_D068866_jlr.D068866-1.pdf]

**Supplementary Data:**

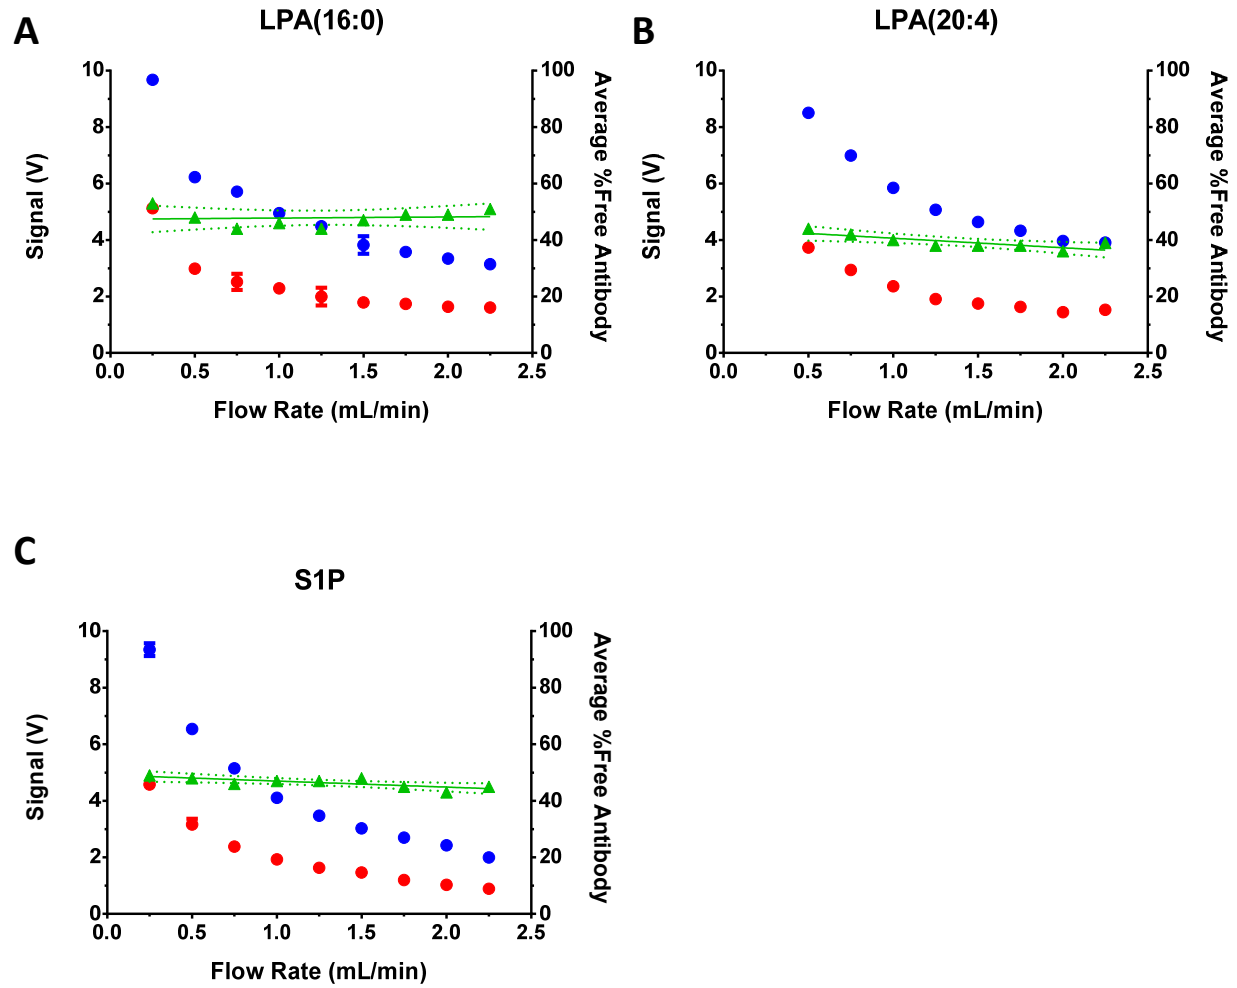

**Supplemental Figure S1. Kinetic exclusion determination.**

Signal (voltage) of samples consisting of antibody in the absence (blue) and presence (red) of lysophospholipid are shown as circles (mean of duplicates) with standard deviation. The green triangles represent the average percent free antibody and the dotted line the 95% confidence band for the best-fit line. A. 10 nM LT3015, 13 nM BSA, and 13 nM LPA(16:0). B. 10 nM LT3015, 13 nM BSA, and 65 nM LPA(20:4). C. 10 nM LT1009, 1  $\mu$ M BSA, and 14 nM S1P.

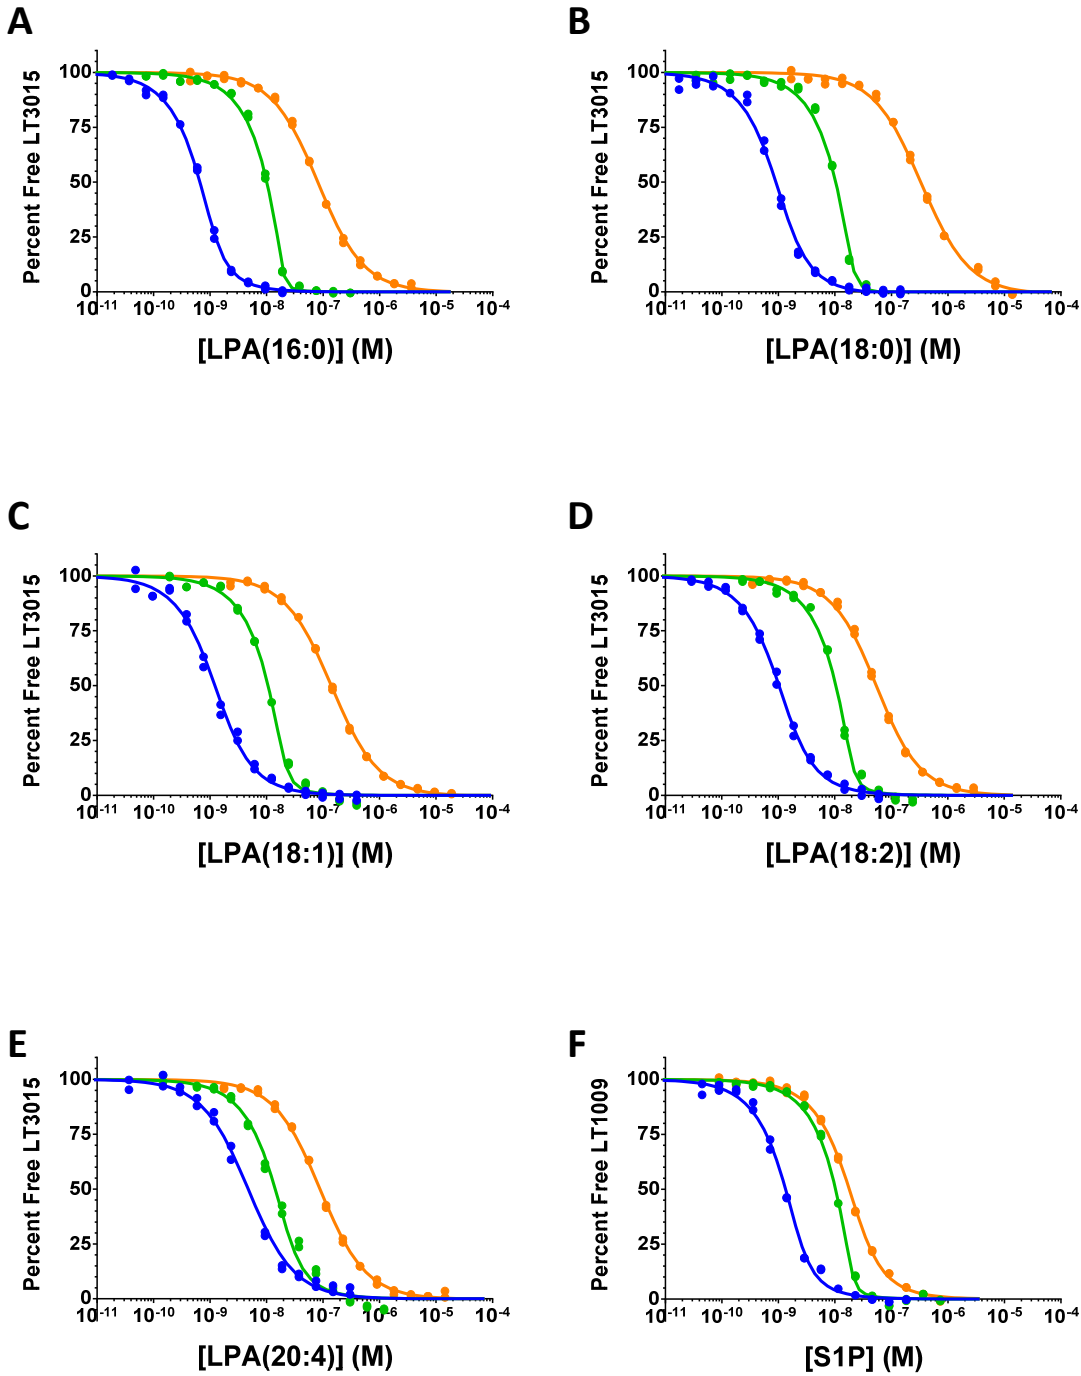

**Supplemental Figure S2. Competition affinity binding experiments with FAF-HSA.**

Global curve fitting of the three affinity experiments used to determine the equilibrium dissociation constants for the individual LPA species (panels A-E) or S1P (panel F) binding the antibody or FAF-HSA in solution. The percentage of antigen-free binding sites on the antibody (in duplicate) is plotted as a

function of the lysophospholipid concentration in each sample. The blue and green curves represent the same experiment described in Figure 2. The LPA (A-E) and S1P (F) experiments shown as orange curves use 10 nM LT3015 and 10  $\mu$ M FAF-HSA or 10 nM LT1009 and 500  $\mu$ M FAF-HSA respectively.

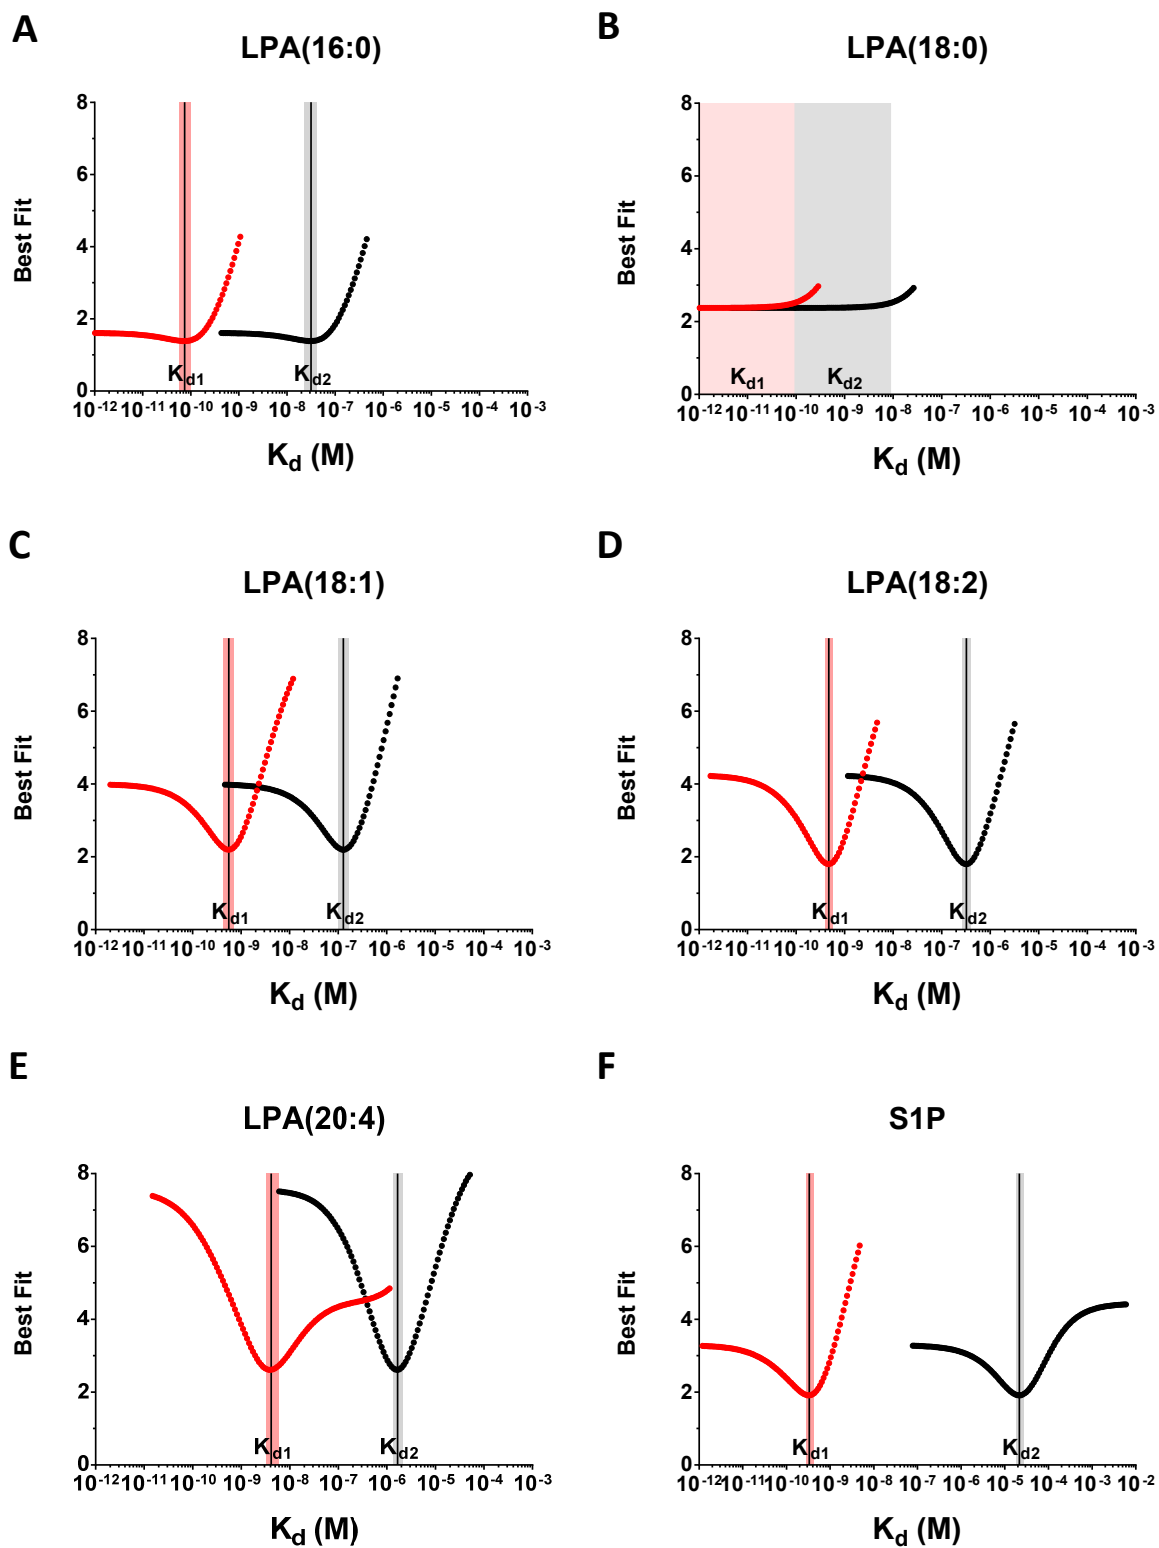

**Supplemental Figure S3. Error curves for FAF-HSA experiments.**

Competition n-curve error curves for the experiments in Supplemental Figure S2. The  $K_d$  values for LPA (A-E) and S1P (F) binding either the antibody ( $K_{d1}$ , red dotted curve) or FAF-HSA ( $K_{d2}$ , black dotted curve) correspond to the position the solid black vertical line intersects the x-axis, and the shaded red and

black bars span the 95% confidence interval for the  $K_{d1}$  and  $K_{d2}$  value, respectively, except for LPA(18:0) (B) where the lower bound does not resolve. All values are reported in Table 2.

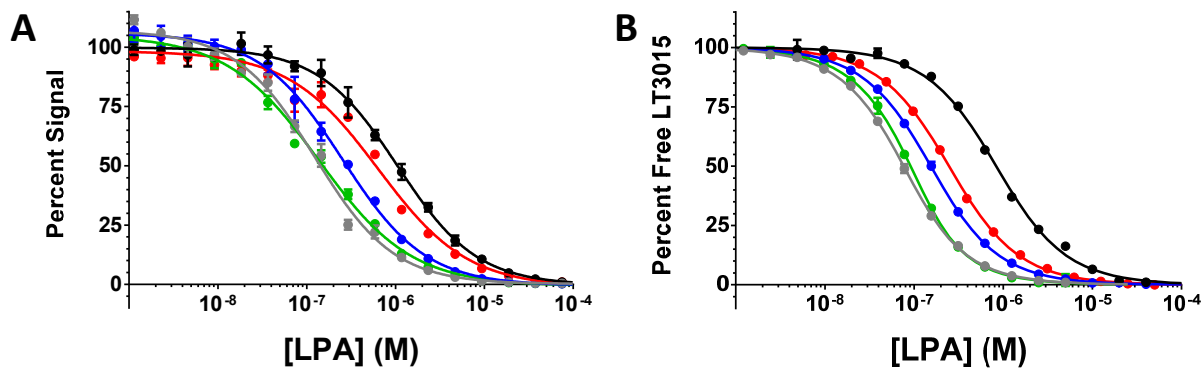

**Supplemental Figure S4. Comparison of ELISA and KinExA methods for evaluating LT3015 binding individual LPA species.**

A. Overlay of competition ELISA isotherms for LT3015 binding each of the five major LPA species: LPA(16:0), grey; LPA(18:0), black; LPA(18:1), blue; LPA(18:2), green; and LPA(20:4), red in the presence of 10  $\mu$ M FAF-BSA. B. Overlay of individual KinExA experiments shown in Figure 2 (orange curves) measured in the presence of 10  $\mu$ M FAF-BSA and LT3015 (procedure described in Materials and Methods) using the same LPA species in (A). The mean and error bars are shown for both graphs. ELISA Method: 96-well polystyrene plates (Greiner) were coated with 100  $\mu$ L/well of 1.0  $\mu$ g/mL goat anti-human IgG, Fc $\gamma$  specific antibody (Jackson ImmunoResearch) in 0.1 M carbonate buffer pH 9.5. Plates were sealed with thermal adhesive and incubated at 4  $^{\circ}$ C overnight. Following a PBS wash, plates were blocked with 150  $\mu$ L/well of PBS + 10  $\mu$ M FAF-BSA for 1 hour at room temperature then washed. 100  $\mu$ L/well of 680 pM LT3015 in PBS + 10  $\mu$ M FAF-BSA was added to the plate and allowed to incubate for 1 hour at room temperature. After washing, a two-fold dilution series starting at 300  $\mu$ M competitor (LPA(16:0), LPA(18:0), LPA(18:1), LPA(18:2), or LPA(20:4)) in PBS + 10  $\mu$ M FAF-BSA was prepared. All competitors were diluted with tracer (LPA(18:0)-S-PEG2-Biotin), which was prepared by reacting thiolated LPA(18:0) in DMSO with 20-fold excess maleimide-PEG2-Biotin in PBS, in PBS + 10  $\mu$ M FAF-BSA to 10 nM tracer. 100  $\mu$ L/well of diluted competitor solution was applied to the plate and allowed to incubate for 17 hours at room temperature. The plates were washed and 100  $\mu$ L/well of 1:60,000 dilution of peroxidase-conjugated streptavidin (Jackson ImmunoResearch) in PBS + 10  $\mu$ M

FAF-BSA and allowed to incubate on the plates for 15 minutes. The plates were washed and developed by allowing 100  $\mu\text{L}$ /well cold TMB (Invitrogen) to incubate on the plates for approximately 5 minutes. The reaction was quenched by addition of 100  $\mu\text{L}$ /well 1.0 M  $\text{H}_2\text{SO}_4$  then read at 450 nm on a plate reader (Perkin Elmer). Data were normalized and analyzed using a non-linear, 4-parameter fit in GraphPad Prism software.

**Supplemental Table 1.  $K_{d1}$  and  $K_{d2}$  values calculated using 1, 2 or 3 equivalent LPA binding sites on serum albumin.**

| Lysophosphatidic Acid |     | 1 Binding Site |          | 2 Binding Sites |             | 3 Binding Sites |             |
|-----------------------|-----|----------------|----------|-----------------|-------------|-----------------|-------------|
|                       |     | $K_{d1}$       | $K_{d2}$ | $K_{d1}$        | $K_{d2}$    | $K_{d1}$        | $K_{d2}$    |
| <b>LPA(16:0)</b>      | BSA | 110 pM         | 24 nM    | 110 pM          | 47 nM       | 100 pM          | 68 nM       |
|                       | HSA | 71 pM          | 10 nM    | 71 pM           | 20 nM       | 74 pM           | 31 nM       |
| <b>LPA(18:1)</b>      | BSA | 560 pM         | 43 nM    | 560 pM          | 86 nM       | 560 pM          | 130 nM      |
|                       | HSA | 560 pM         | 44 nM    | 560 pM          | 86 nM       | 560 pM          | 130 nM      |
| <b>LPA(18:2)</b>      | BSA | 470 pM         | 120 nM   | 470 pM          | 230 nM      | 470 pM          | 350 nM      |
|                       | HSA | 470 pM         | 110 nM   | 470 pM          | 210 nM      | 470 pM          | 320 nM      |
| <b>LPA(20:4)</b>      | BSA | 4.1 nM         | 720 nM   | 4.1 nM          | 1.4 $\mu$ M | 4.2 nM          | 2.2 $\mu$ M |
|                       | HSA | 4.0 nM         | 540 nM   | 4.0 nM          | 1.1 $\mu$ M | 4.1 nM          | 1.7 $\mu$ M |



**Supplemental Table 2. Percent total S1P bound by apoM-HDL, apoM-LDL, HSA, or free at various reported physiological concentrations of components.<sup>a</sup>**

| <b>apoM-HDL</b> | <b>apoM-LDL</b> | <b>HSA</b>                 | <b>Total S1P</b> | <b>apoM-HDL-S1P</b> | <b>apoM-LDL-S1P</b> | <b>HSA-S1P</b>      | <b>Free S1P</b>     |
|-----------------|-----------------|----------------------------|------------------|---------------------|---------------------|---------------------|---------------------|
| <b>(nM)</b>     | <b>(nM)</b>     | <b>(<math>\mu</math>M)</b> | <b>(nM)</b>      | <b>(%Total S1P)</b> | <b>(%Total S1P)</b> | <b>(%Total S1P)</b> | <b>(%Total S1P)</b> |
| 600             | 10              | 530                        | 100              | 49                  | 4.4                 | 45                  | 1.9                 |
| 600             | 10              | 530                        | 400              | 44                  | 2.0                 | 52                  | 2.2                 |
| 600             | 10              | 530                        | 1200             | 31                  | 0.8                 | 66                  | 2.7                 |
| 600             | 10              | 670                        | 100              | 44                  | 4.1                 | 50                  | 1.7                 |
| 600             | 10              | 670                        | 400              | 39                  | 1.9                 | 57                  | 1.9                 |
| 600             | 10              | 670                        | 1200             | 28                  | 0.8                 | 69                  | 2.3                 |
| 600             | 10              | 760                        | 100              | 41                  | 3.9                 | 53                  | 1.5                 |
| 600             | 10              | 760                        | 400              | 37                  | 1.9                 | 59                  | 1.7                 |
| 600             | 10              | 760                        | 1200             | 27                  | 0.8                 | 70                  | 2.0                 |
| 600             | 25              | 530                        | 100              | 46                  | 10.5                | 42                  | 1.7                 |
| 600             | 25              | 530                        | 400              | 43                  | 4.9                 | 50                  | 2.1                 |
| 600             | 25              | 530                        | 1200             | 30                  | 1.9                 | 65                  | 2.7                 |
| 600             | 25              | 670                        | 100              | 41                  | 9.8                 | 47                  | 1.6                 |
| 600             | 25              | 670                        | 400              | 38                  | 4.7                 | 55                  | 1.8                 |
| 600             | 25              | 670                        | 1200             | 28                  | 1.9                 | 68                  | 2.2                 |
| 600             | 25              | 760                        | 100              | 39                  | 9.4                 | 50                  | 1.5                 |
| 600             | 25              | 760                        | 400              | 36                  | 4.6                 | 58                  | 1.7                 |
| 600             | 25              | 760                        | 1200             | 27                  | 1.9                 | 69                  | 2.0                 |
| 600             | 40              | 530                        | 100              | 43                  | 16.1                | 39                  | 1.6                 |

|     |    |     |      |    |      |    |     |
|-----|----|-----|------|----|------|----|-----|
| 600 | 40 | 530 | 400  | 42 | 7.7  | 49 | 2.0 |
| 600 | 40 | 530 | 1200 | 30 | 3.1  | 64 | 2.7 |
| 600 | 40 | 670 | 100  | 39 | 15.1 | 44 | 1.5 |
| 600 | 40 | 670 | 400  | 38 | 7.4  | 53 | 1.8 |
| 600 | 40 | 670 | 1200 | 28 | 3.1  | 67 | 2.2 |
| 600 | 40 | 760 | 100  | 37 | 14.5 | 47 | 1.4 |
| 600 | 40 | 760 | 400  | 35 | 7.3  | 56 | 1.6 |
| 600 | 40 | 760 | 1200 | 27 | 3.0  | 68 | 2.0 |
| 900 | 10 | 530 | 100  | 59 | 3.8  | 36 | 1.5 |
| 900 | 10 | 530 | 400  | 55 | 1.9  | 41 | 1.7 |
| 900 | 10 | 530 | 1200 | 42 | 0.8  | 55 | 2.3 |
| 900 | 10 | 670 | 100  | 54 | 3.6  | 41 | 1.3 |
| 900 | 10 | 670 | 400  | 50 | 1.8  | 46 | 1.5 |
| 900 | 10 | 670 | 1200 | 39 | 0.8  | 58 | 1.9 |
| 900 | 10 | 760 | 100  | 51 | 3.5  | 44 | 1.3 |
| 900 | 10 | 760 | 400  | 48 | 1.8  | 49 | 1.4 |
| 900 | 10 | 760 | 1200 | 37 | 0.7  | 60 | 1.7 |
| 900 | 25 | 530 | 100  | 56 | 9.2  | 34 | 1.4 |
| 900 | 25 | 530 | 400  | 54 | 4.6  | 40 | 1.7 |
| 900 | 25 | 530 | 1200 | 42 | 1.9  | 54 | 2.2 |
| 900 | 25 | 670 | 100  | 51 | 8.7  | 39 | 1.3 |
| 900 | 25 | 670 | 400  | 49 | 4.4  | 45 | 1.5 |
| 900 | 25 | 670 | 1200 | 39 | 1.9  | 57 | 1.9 |
| 900 | 25 | 760 | 100  | 49 | 8.4  | 42 | 1.2 |
| 900 | 25 | 760 | 400  | 47 | 4.4  | 48 | 1.4 |

|      |    |     |      |    |      |    |     |
|------|----|-----|------|----|------|----|-----|
| 900  | 25 | 760 | 1200 | 37 | 1.9  | 59 | 1.7 |
| 900  | 40 | 530 | 100  | 53 | 14.1 | 32 | 1.3 |
| 900  | 40 | 530 | 400  | 53 | 7.3  | 39 | 1.6 |
| 900  | 40 | 530 | 1200 | 42 | 3.1  | 53 | 2.2 |
| 900  | 40 | 670 | 100  | 49 | 13.4 | 37 | 1.2 |
| 900  | 40 | 670 | 400  | 48 | 7.0  | 43 | 1.4 |
| 900  | 40 | 670 | 1200 | 39 | 3.0  | 57 | 1.9 |
| 900  | 40 | 760 | 100  | 46 | 12.9 | 39 | 1.1 |
| 900  | 40 | 760 | 400  | 46 | 6.9  | 46 | 1.3 |
| 900  | 40 | 760 | 1200 | 37 | 3.0  | 58 | 1.7 |
| 1300 | 10 | 530 | 100  | 68 | 3.2  | 28 | 1.2 |
| 1300 | 10 | 530 | 400  | 65 | 1.7  | 32 | 1.3 |
| 1300 | 10 | 530 | 1200 | 55 | 0.7  | 43 | 1.8 |
| 1300 | 10 | 670 | 100  | 63 | 3.1  | 33 | 1.1 |
| 1300 | 10 | 670 | 400  | 61 | 1.7  | 37 | 1.2 |
| 1300 | 10 | 670 | 1200 | 51 | 0.7  | 47 | 1.5 |
| 1300 | 10 | 760 | 100  | 61 | 3.0  | 35 | 1.0 |
| 1300 | 10 | 760 | 400  | 58 | 1.6  | 39 | 1.1 |
| 1300 | 10 | 760 | 1200 | 49 | 0.7  | 49 | 1.4 |
| 1300 | 25 | 530 | 100  | 65 | 7.8  | 26 | 1.1 |
| 1300 | 25 | 530 | 400  | 64 | 4.3  | 31 | 1.3 |
| 1300 | 25 | 530 | 1200 | 54 | 1.9  | 42 | 1.8 |
| 1300 | 25 | 670 | 100  | 60 | 7.5  | 31 | 1.0 |
| 1300 | 25 | 670 | 400  | 59 | 4.1  | 36 | 1.2 |
| 1300 | 25 | 670 | 1200 | 50 | 1.8  | 46 | 1.5 |

|      |    |     |      |    |      |    |     |
|------|----|-----|------|----|------|----|-----|
| 1300 | 25 | 760 | 100  | 58 | 7.2  | 34 | 1.0 |
| 1300 | 25 | 760 | 400  | 57 | 4.1  | 38 | 1.1 |
| 1300 | 25 | 760 | 1200 | 48 | 1.8  | 49 | 1.4 |
| 1300 | 40 | 530 | 100  | 62 | 12.1 | 25 | 1.0 |
| 1300 | 40 | 530 | 400  | 62 | 6.7  | 30 | 1.2 |
| 1300 | 40 | 530 | 1200 | 54 | 3.0  | 42 | 1.7 |
| 1300 | 40 | 670 | 100  | 58 | 11.6 | 30 | 1.0 |
| 1300 | 40 | 670 | 400  | 58 | 6.5  | 35 | 1.1 |
| 1300 | 40 | 670 | 1200 | 50 | 2.9  | 46 | 1.5 |
| 1300 | 40 | 760 | 100  | 55 | 11.2 | 32 | 0.9 |
| 1300 | 40 | 760 | 400  | 55 | 6.4  | 37 | 1.1 |
| 1300 | 40 | 760 | 1200 | 48 | 2.9  | 48 | 1.4 |

---

<sup>a</sup>  $K_{d2}$  values used for deriving percentages were as reported in this paper (apoM-HDL: 21 nM, apoM-LDL: 2.4 nM, HSA: 22  $\mu$ M).

**Supplemental Table 3. Percent total protein bound to S1P at various reported physiological concentrations of components.<sup>a</sup>**

| <b>apoM-<br/>HDL<br/>(nM)</b> | <b>apoM-<br/>LDL<br/>(nM)</b> | <b>HSA<br/>(<math>\mu</math>M)</b> | <b>Total<br/>S1P<br/>(nM)</b> | <b>apoM-HDL-<br/>S1P<br/>(%Total apoM-<br/>HDL)</b> | <b>apoM-LDL-<br/>S1P<br/>(%Total<br/>apoM-LDL)</b> | <b>HSA-<br/>S1P<br/>(%Total<br/>HSA)</b> |
|-------------------------------|-------------------------------|------------------------------------|-------------------------------|-----------------------------------------------------|----------------------------------------------------|------------------------------------------|
| 600                           | 10                            | 530                                | 100                           | 8.2                                                 | 44                                                 | 0.008                                    |
| 600                           | 10                            | 530                                | 400                           | 29                                                  | 80                                                 | 0.039                                    |
| 600                           | 10                            | 530                                | 1200                          | 62                                                  | 96                                                 | 0.149                                    |
| 600                           | 10                            | 670                                | 100                           | 7.3                                                 | 41                                                 | 0.007                                    |
| 600                           | 10                            | 670                                | 400                           | 26                                                  | 76                                                 | 0.034                                    |
| 600                           | 10                            | 670                                | 1200                          | 56                                                  | 96                                                 | 0.124                                    |
| 600                           | 10                            | 760                                | 100                           | 6.8                                                 | 39                                                 | 0.007                                    |
| 600                           | 10                            | 760                                | 400                           | 25                                                  | 76                                                 | 0.031                                    |
| 600                           | 10                            | 760                                | 1200                          | 54                                                  | 96                                                 | 0.111                                    |
| 600                           | 25                            | 530                                | 100                           | 7.7                                                 | 42                                                 | 0.008                                    |
| 600                           | 25                            | 530                                | 400                           | 29                                                  | 78                                                 | 0.038                                    |
| 600                           | 25                            | 530                                | 1200                          | 60                                                  | 91                                                 | 0.147                                    |
| 600                           | 25                            | 670                                | 100                           | 6.8                                                 | 39                                                 | 0.007                                    |
| 600                           | 25                            | 670                                | 400                           | 25                                                  | 75                                                 | 0.033                                    |
| 600                           | 25                            | 670                                | 1200                          | 56                                                  | 91                                                 | 0.122                                    |
| 600                           | 25                            | 760                                | 100                           | 6.5                                                 | 38                                                 | 0.007                                    |
| 600                           | 25                            | 760                                | 400                           | 24                                                  | 74                                                 | 0.031                                    |
| 600                           | 25                            | 760                                | 1200                          | 54                                                  | 91                                                 | 0.109                                    |
| 600                           | 40                            | 530                                | 100                           | 7.2                                                 | 40                                                 | 0.007                                    |

|     |    |     |      |     |    |       |
|-----|----|-----|------|-----|----|-------|
| 600 | 40 | 530 | 400  | 28  | 77 | 0.037 |
| 600 | 40 | 530 | 1200 | 60  | 93 | 0.145 |
| 600 | 40 | 670 | 100  | 6.5 | 38 | 0.007 |
| 600 | 40 | 670 | 400  | 25  | 74 | 0.032 |
| 600 | 40 | 670 | 1200 | 56  | 93 | 0.120 |
| 600 | 40 | 760 | 100  | 6.2 | 36 | 0.006 |
| 600 | 40 | 760 | 400  | 23  | 73 | 0.029 |
| 600 | 40 | 760 | 1200 | 54  | 90 | 0.107 |
| 900 | 10 | 530 | 100  | 6.6 | 38 | 0.007 |
| 900 | 10 | 530 | 400  | 24  | 76 | 0.031 |
| 900 | 10 | 530 | 1200 | 56  | 96 | 0.125 |
| 900 | 10 | 670 | 100  | 6.0 | 36 | 0.006 |
| 900 | 10 | 670 | 400  | 22  | 72 | 0.027 |
| 900 | 10 | 670 | 1200 | 52  | 96 | 0.104 |
| 900 | 10 | 760 | 100  | 5.7 | 35 | 0.006 |
| 900 | 10 | 760 | 400  | 21  | 72 | 0.026 |
| 900 | 10 | 760 | 1200 | 49  | 84 | 0.095 |
| 900 | 25 | 530 | 100  | 6.2 | 37 | 0.006 |
| 900 | 25 | 530 | 400  | 24  | 74 | 0.030 |
| 900 | 25 | 530 | 1200 | 56  | 91 | 0.122 |
| 900 | 25 | 670 | 100  | 5.7 | 35 | 0.006 |
| 900 | 25 | 670 | 400  | 22  | 70 | 0.027 |
| 900 | 25 | 670 | 1200 | 52  | 91 | 0.102 |
| 900 | 25 | 760 | 100  | 5.4 | 34 | 0.006 |
| 900 | 25 | 760 | 400  | 21  | 70 | 0.025 |

|      |    |     |      |     |    |       |
|------|----|-----|------|-----|----|-------|
| 900  | 25 | 760 | 1200 | 49  | 91 | 0.093 |
| 900  | 40 | 530 | 100  | 5.9 | 35 | 0.006 |
| 900  | 40 | 530 | 400  | 24  | 73 | 0.029 |
| 900  | 40 | 530 | 1200 | 56  | 93 | 0.120 |
| 900  | 40 | 670 | 100  | 5.4 | 34 | 0.006 |
| 900  | 40 | 670 | 400  | 21  | 70 | 0.026 |
| 900  | 40 | 670 | 1200 | 52  | 90 | 0.102 |
| 900  | 40 | 760 | 100  | 5.1 | 32 | 0.005 |
| 900  | 40 | 760 | 400  | 20  | 69 | 0.024 |
| 900  | 40 | 760 | 1200 | 49  | 90 | 0.092 |
| 1300 | 10 | 530 | 100  | 5.2 | 32 | 0.005 |
| 1300 | 10 | 530 | 400  | 20  | 68 | 0.024 |
| 1300 | 10 | 530 | 1200 | 51  | 84 | 0.097 |
| 1300 | 10 | 670 | 100  | 4.9 | 31 | 0.005 |
| 1300 | 10 | 670 | 400  | 19  | 68 | 0.022 |
| 1300 | 10 | 670 | 1200 | 47  | 84 | 0.084 |
| 1300 | 10 | 760 | 100  | 4.7 | 30 | 0.005 |
| 1300 | 10 | 760 | 400  | 18  | 64 | 0.021 |
| 1300 | 10 | 760 | 1200 | 45  | 84 | 0.077 |
| 1300 | 25 | 530 | 100  | 5.0 | 31 | 0.005 |
| 1300 | 25 | 530 | 400  | 20  | 69 | 0.023 |
| 1300 | 25 | 530 | 1200 | 50  | 91 | 0.095 |
| 1300 | 25 | 670 | 100  | 4.6 | 30 | 0.005 |
| 1300 | 25 | 670 | 400  | 18  | 66 | 0.021 |
| 1300 | 25 | 670 | 1200 | 46  | 86 | 0.082 |

|      |    |     |      |     |    |       |
|------|----|-----|------|-----|----|-------|
| 1300 | 25 | 760 | 100  | 4.5 | 29 | 0.004 |
| 1300 | 25 | 760 | 400  | 18  | 66 | 0.020 |
| 1300 | 25 | 760 | 1200 | 44  | 86 | 0.077 |
| 1300 | 40 | 530 | 100  | 4.8 | 30 | 0.005 |
| 1300 | 40 | 530 | 400  | 19  | 67 | 0.023 |
| 1300 | 40 | 530 | 1200 | 50  | 90 | 0.095 |
| 1300 | 40 | 670 | 100  | 4.5 | 29 | 0.004 |
| 1300 | 40 | 670 | 400  | 18  | 65 | 0.021 |
| 1300 | 40 | 670 | 1200 | 46  | 87 | 0.082 |
| 1300 | 40 | 760 | 100  | 4.2 | 28 | 0.004 |
| 1300 | 40 | 760 | 400  | 17  | 64 | 0.019 |
| 1300 | 40 | 760 | 1200 | 44  | 87 | 0.076 |

---

<sup>a</sup>  $K_{d2}$  values used for deriving percentages were as reported in this paper (apoM-HDL: 21 nM, apoM-LDL: 2.4 nM, HSA: 22  $\mu$ M).
